# Supplementary material for: A gene variant near ATM is significantly associated with metformin treatment response in type 2 diabetes: a replication and meta-analysis of five cohorts
Source: PubMed Central journal article supplement (PMC3369131; doi:10.1007/s00125-012-2537-x), 2012-03-28
Supplement: 125_2012_2537_MOESM1_ESM.pdf [file 125_2012_2537_MOESM1_ESM.pdf]

**ESM Figure 1.**

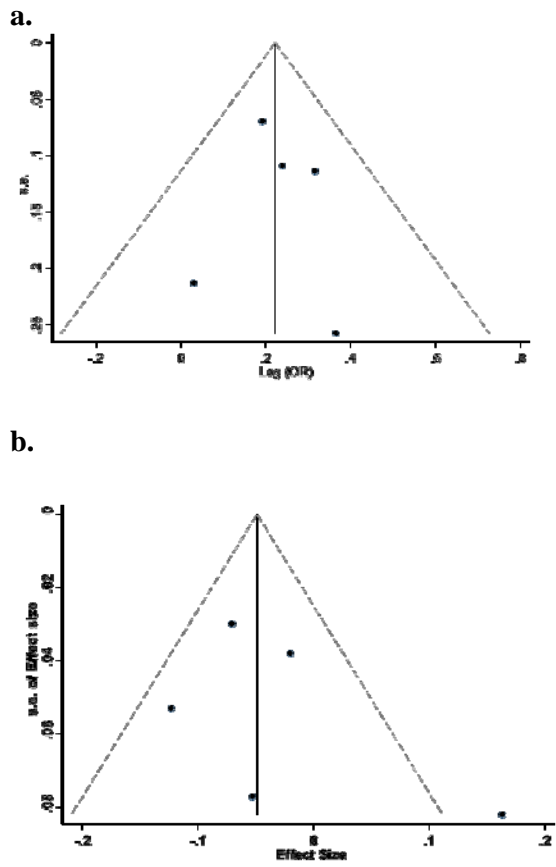

**ESM Figure 1.** Funnel plot with 95% confidence limits for a. the logistic regression meta-analysis (bias assessed with the Harbord method: 1.13 (95%CI -0.43, 0.53)  $p=0.505$ ) and b. the linear regression meta-analysis (bias assessed with the Egger method: 1.76 (95% CI = -4.52, 8.04)  $p=0.438$ )
