# Supplementary material for: A gene variant near ATM is significantly associated with metformin treatment response in type 2 diabetes: a replication and meta-analysis of five cohorts
Source: PubMed Central journal article supplement (PMC3369131; doi:10.1007/s00125-012-2537-x), 2012-03-28
Supplement: 125_2012_2537_MOESM2_ESM.pdf [file 125_2012_2537_MOESM2_ESM.pdf]

**ESM Table 1:** Logistic regression for the ability to reach the metformin treatment target of HbA<sub>1c</sub><7% according to the *ATM* rs11212617 genotype. Only patients with a baseline HbA<sub>1c</sub>>7% are included in the analysis.

| Study                                                                                     | Group        | n    | OR (95%CI)        | SE   | P value              |
|-------------------------------------------------------------------------------------------|--------------|------|-------------------|------|----------------------|
| DCS                                                                                       | Total group  | 288  | 1.43 (1.02, 2.00) | 0.17 | 0.041                |
|                                                                                           | Mono therapy | 136  | 1.79 (1.09, 2.93) | 0.25 | 0.020                |
|                                                                                           | Dual therapy | 152  | 1.15 (0.70, 1.89) | 0.25 | 0.57                 |
| Rotterdam Study                                                                           | Total group  | 182  | 1.45 (0.87, 2.39) | 0.26 | 0.15                 |
|                                                                                           | Mono therapy | 65   | 1.97 (0.72, 5.42) | 0.52 | 0.18                 |
|                                                                                           | Dual therapy | 117  | 1.40 (0.77, 2.57) | 0.31 | 0.27                 |
| CARDS                                                                                     | Total group  | 237  | 1.06 (0.69, 1.64) | 0.22 | 0.77                 |
|                                                                                           | Mono therapy | 71   | 1.56 (0.76, 3.10) | 0.36 | 0.21                 |
|                                                                                           | Dual therapy | 166  | 0.85 (0.47, 1.52) | 0.30 | 0.59                 |
| Meta-analysis                                                                             | Total group  | 707  | 1.31 (1.04, 1.66) | 0.12 | 0.024                |
|                                                                                           | Mono therapy | 272  | 1.76 (1.20, 2.54) | 0.19 | 0.0035               |
|                                                                                           | Dual therapy | 435  | 1.11 (0.81, 1.53) | 0.16 | 0.52                 |
| Meta-analysis including stage 2 replication cohorts previously used by Zhou et al. (2011) |              |      |                   |      |                      |
| GoDARTS                                                                                   | Total group  | 1783 | 1.21 (1.05, 1.38) | 0.07 | 0.007                |
|                                                                                           | Mono therapy | 1291 | 1.29 (1.10, 1.51) | 0.08 | 0.002                |
|                                                                                           | Dual therapy | 495  | 1.05 (0.81, 1.36) | 0.13 | 0.70                 |
| UKPDS                                                                                     | Total group  | 799  | 1.24 (0.93, 1.66) | 0.12 | 0.14                 |
|                                                                                           | Mono therapy | 138  | 1.51 (0.89, 2.56) | 0.27 | 0.13                 |
|                                                                                           | Dual therapy | 661  | 1.14 (0.80, 1.62) | 0.18 | 0.47                 |
| Meta-analysis                                                                             | Total group  | 3289 | 1.24 (1.11, 1.38) | 0.06 | 1.2*10 <sup>-4</sup> |
|                                                                                           | Mono therapy | 1701 | 1.36 (1.18, 1.56) | 0.07 | 1.7*10 <sup>-5</sup> |
|                                                                                           | Dual therapy | 1591 | 1.09 (0.92, 1.30) | 0.09 | 0.34                 |

Additive logistic regression models were used for calculating the C-allelic odds ratios (OR) in each cohort. Covariates included where baseline HbA<sub>1c</sub>, baseline gap (except DCS), daily dose, drug adherence (except for DCS and CARDS), and eGFR (except for CARDS and Rotterdam Study). In the meta-analysis a fixed effects model was used.
