# Supplementary material for: A gene variant near ATM is significantly associated with metformin treatment response in type 2 diabetes: a replication and meta-analysis of five cohorts
Source: PubMed Central journal article supplement (PMC3369131; doi:10.1007/s00125-012-2537-x), 2012-03-28
Supplement: 125_2012_2537_MOESM3_ESM.pdf [file 125_2012_2537_MOESM3_ESM.pdf]

**ESM Table 2.** Linear regression for treatment HbA<sub>1c</sub> per ATM allele. Only patients with a baselineHbA<sub>1c</sub> >7% are included in the analysis.

| Study                                                                                    | Group        | n    | Beta (95% CI)           | SE    | P value |
|------------------------------------------------------------------------------------------|--------------|------|-------------------------|-------|---------|
| DCS                                                                                      | Total group  | 287  | -0.060 (-0.231, 0.111)  | 0.087 | 0.49    |
|                                                                                          | Mono therapy | 135  | -0.036 (-0.280, 0.208)  | 0.124 | 0.77    |
|                                                                                          | Dual therapy | 152  | -0.085 (-0.335, 0.163)  | 0.126 | 0.50    |
| Rotterdam Study                                                                          | Total group  | 182  | -0.053 (-0.205, 0.098)  | 0.077 | 0.49    |
|                                                                                          | Mono therapy | 65   | -0.107 (-0.327, 0.113)  | 0.112 | 0.33    |
|                                                                                          | Dual therapy | 117  | -0.069 (-0.266, 0.127)  | 0.100 | 0.49    |
| CARDS                                                                                    | Total group  | 237  | 0.151 (-0.012, 0.332)   | 0.084 | 0.07    |
|                                                                                          | Mono therapy | 71   | -0.120 (-0.465, 0.223)  | 0.173 | 0.49    |
|                                                                                          | Dual therapy | 166  | 0.270 (0.070, 0.469)    | 0.100 | 0.008   |
| Meta-analysis                                                                            | Total group  | 706  | 0.010 (-0.083, 0.103)   | 0.048 | 0.83    |
|                                                                                          | Mono therapy | 271  | -0.084 (-0.231, 0.064)  | 0.075 | 0.27    |
|                                                                                          | Dual therapy | 435  | 0.058 (-0.063, -0.179)  | 0.004 | 0.35    |
| Meta-analysis including stage 2 replication cohorts previously used by Zhou et al.(2011) |              |      |                         |       |         |
| GoDARTS                                                                                  | Total group  | 1783 | -0.072 (-0.134, -0.011) | 0.031 | 0.021   |
|                                                                                          | Mono therapy | 1291 | -0.092 (-0.164, -0.019) | 0.037 | 0.013   |
|                                                                                          | Dual therapy | 495  | -0.040 (-0.160, 0.070)  | 0.059 | 0.45    |
| UKPDS                                                                                    | Total group  | 799  | -0.080 (-0.212, 0.053)  | 0.068 | 0.24    |
|                                                                                          | Mono therapy | 138  | -0.272 (-0.564, 0.020)  | 0.149 | 0.07    |
|                                                                                          | Dual therapy | 661  | -0.040 (-0.190, 0.107)  | 0.076 | 0.58    |
| Meta-analysis                                                                            | Total group  | 3288 | -0.051 (-0.099, -0.004) | 0.024 | 0.035   |
|                                                                                          | Mono therapy | 1700 | -0.099 (-0.162, -0.035) | 0.032 | 0.0023  |
|                                                                                          | Dual therapy | 1591 | -0.005 (-0.077, 0.068)  | 0.037 | 0.89    |

An additive linear regression model was used for calculating the per C-allele change in treatment HbA<sub>1c</sub>. Covariates included where baseline HbA<sub>1c</sub>, baseline gap (except DCS), daily dose, drug adherence (except for DCS and CARDS), and eGFR (except for CARDS and Rotterdam Study). The p-value of the genotype effect is given. In the meta-analysis a fixed effects model was used.
